# Supplementary material
Source: publisher site journal article supplement (https://www.dovepress.com/article/321507)
Supplement: Supplementary file 1 [file get_supplementary_file.php]

**Table S1. Clinical characteristics in survivors and non-survivors.**

|  | Survivors  N=40 | Non-survivors  N=13 | P value |
| --- | --- | --- | --- |
| Systemic complications (%) |  |  |  |
| Shock | 17(42.5%) | 10(76.92%) | 0.054 |
| AKI | 22(55%) | 13(100%) | 0.002* |
| ARDS | 33(82.5%) | 13(100%) | 0.174 |
| Bacterial culture results (%) |  |  |  |
| Klebsiellapneumoniae | 22(55%) | 11(84.62%) | 0.098 |
| Enterococcus faecium | 8(20%) | 8(61.54%) | 0.005* |
| Acinetobacterbaumannii | 19(47.5%) | 8(61.54%) | 0.379 |
| Fungus | 5(12.5%) | 6(46.15%) | 0.009* |
| Management of necrosis |  |  |  |
| PCD (%) | 38 (95%) | 13 (100%) | 1.00 |
| ED (%) | 30 (75%) | 8 (61.5%) | 1.00 |
| ON (%) | 11 (27.5%) | 5 (38.5%) | 1.00 |
| PICS (%) | 26(65%) | 12(92.31%) | 0.08 |
| Hospital stay, days, median (IQR) | 40(26.5-59.25) | 29(17-54) | 0.247 |
| ICU stay, days, median (IQR) | 25.5(13.25-36.75) | 23(16.5-54) | 0.584 |
| Hospital costs, (1,000¥), median (IQR) | 299.3(212.6-419.4) | 315.9(172.8-750.1) | 0.535 |

**Abbreviations:** AKI: acute kidney injury, ARDS: acute respiratory distress syndrome, ED: endoscopic debridement, ICU: intensive care unit, IQR: Inter Quartile Range, ON: open ndectomy, PCD: percutaneous catheter drainage, PICS: persistent inflammation immunosuppression catabolism syndrome.*P<0.05.

**Table S2 Clinical characteristics in readmission group and non-readmission group**

|  | Readmission group,  N=16 | Non-readmission  group, N=23 | P value |
| --- | --- | --- | --- |
| Gender,Male/Female | 10/6 | 18/5 | 0.282 |
| Age,years, mean±SD | 47.19±12.53 | 39.30±12.96 | 0.066 |
| BMI, mean±SD | 25.17±5.96 | 25.06±3.89 | 0.945 |
| Etiology(%) |  |  | 0.179 |
| Biliary | 7(43.75%) | 9(39.13%) |  |
| Hyperlipidemia | 7(43.75%) | 14(60.87%) |  |
| Iatrogenic | 2(12.5%) | 0(0%) |  |
| Interval between onset of AP and hospital discharge | 95 (77-121) | 81 (63-124) | 0.275 |
| APACHE II score, mean±SD | 12.50±3.08 | 10.30±3.38 | 0.046* |
| SOFA score, mean±SD | 5.06±3.21 | 5.35±2.82 | 0.771 |
| Numbers of extrapancreatic collections | 2 (1-2) | 2 (2-2) | 0.217 |
| Extent of necrosis |  |  | 0.380 |
| ≤30% | 5 (31.3%) | 3 (13.0%) |  |
| 30- 50% | 3 (18.8%) | 5 (21.7%) |  |
| ≥50% | 8 (50.0%) | 15 (65.2%) |  |
| Management of necrosis |  |  |  |
| PCD (%) | 15 (93.8%) | 23 (100%) | 0.410 |
| ED (%) | 15 (93.8%) | 15 (65.2%) | 0.262 |
| ON (%) | 4 (25.0%) | 6 (26.1%) | 1.00 |
| Leukocyte count, 109, mean±SD | 10.55±7.42 | 10.45±5.25 | 0.964 |
| Neutrophil count, 109, mean±SD | 8.73±6.81 | 8.61±5.00 | 0.950 |
| Lymphocyte count, 109, mean±SD | 0.94±0.48 | 1.08±0.51 | 0.403 |
| CRP, mg/L, mean±SD | 53.01±58.20 | 63.76±57.10 | 0.569 |
| Lactic acid, mmol/L, mean±SD | 4.13±2.81 | 4.11±2.69 | 0.986 |
| PCT, ng/ml, median (IQR) | 1.15 (0.39-6.24) | 1.22 (0.41-4.47) | 0.267 |
| Albumin,g/L, mean±SD | 31.28±2.74 | 32.16±3.95 | 0.446 |
| Prealbumin,g/L, mean±SD | 60.06±49.08 | 89.65±47.51 | 0.067 |
| Target-reaching of EN at day 7 after admission (%) | 7 (43.75%) | 19 (82.61%) | 0.017* |
| IL-6, ng/ml, median (IQR) | 88.9 (39.2-124.4) | 106.8 (79.5-213.6) | 0.191 |
| PICS (%) | 11 (68.75%) | 14 (60.87%) | 0.74 |
| Bacterial culture results (%) |  |  |  |
| Klebsiellapneumoniae | 10 (62.5%) | 11 (47.83%) | 0.366 |
| Enterococcus faecium | 3 (18.75%) | 5 (21.74%) | 1.00 |
| Acinetobacterbaumannii | 8 (50%) | 10 (43.48%) | 0.688 |
| Fungus | 2 (12.5%) | 3 (13.04%) | 1.00 |

**Abbreviations:** AP: acute pancreatitis, APACHE II: acute physiology and chronic health Evaluation II, BMI: body mass index, CRP: C-reactive protein, ED: endoscopic debridement, EN: enteral nutrition, IL-6: interleukin-6, mHLA-DR: monocytic human leukocyte antigen DR, nCD88: neutrophil CD88, IQR: Inter Quartile Range, ON: open ndectomy, PCD: percutaneous catheter drainage, PCT: procalcitonin, PICS: persistent inflammation immunosuppression catabolism syndrome, SD: standard deviation, SOFA: sequential organ failure assessment, Treg: regulatory T cells. *P<0.05.

**Table S3 Comparison of immune function between readmission group and non-readmission group**

|  | **Readmission group,**  **N=16** | **Non-readmission group**  **group, N=23** | **P value** |
| --- | --- | --- | --- |
| mHLA-DR (AB/C)  T1, mean±SD  T2, mean±SD  T3, mean±SD  T4, mean±SD  T5, mean±SD  T6, mean±SD  Treg (%)  T1, mean±SD  T2, mean±SD  T3, mean±SD  T4, mean±SD  T5, median (IQR)  T6, mean±SD  nCD88 (%)  T1, mean±SD  T2, mean±SD  T3, mean±SD  T4, median (IQR)  T5, median (IQR)  T6, mean±SD | 8446.50±4342.22  13327.69±8603.90  13467.31±4706.18  15360.63±8075.39  19745.06±9064.56  27117.31±13826.06  8.38±1.74  8.11±1.54  7.35±1.03  6.74±2.23  6.64(6.13-7.37)  6.63±0.72  47.91±4.93  51.30±7.18  55.35±5.69  55.12(52.57-59.87)  57.65(52.39-62.7)  59.40±7.95 | 11247.04±6937.41  14468.87±7514.70  20690.74±7889.58  25436.39±13003.09  27645.77±12384.92  36066.38±14433.85  8.87±1.69  8.03±2.05  7.40±1.50  7.51±1.86  6.98(6.38-7.63)  6.51±0.62  48.33±6.17  53.23±4.15  54.90±5.19  56.57(54-59)  60.88(56.59-62.25)  60.27±6.10 | 0.162  0.663  0.002 *  0.009 *  0.037 *  0.065  0.380  0.898  0.909  0.244  0.825  0.600  0.821  0.295  0.801  0.948  0.097  0.452 |

**Abbreviations:** mHLA-DR: monocytic human leukocyte antigen DR, nCD88: neutrophil CD88, IQR: Inter Quartile Range, ON: open ndectomy, SD: standard deviation, Treg: regulatory T cells.

**P*<0.05.
